# Supplementary material
Source: Royal Society of Chemistry journal article supplement (doi:10.1039/d6md00097e)
Supplement: d6md00097e1.pdf [file d6md00097e1.pdf]

# Supplementary data

## **Phenoxyacetic Acid Scaffold as a Platform for Dual Anticonvulsant and Anti-Inflammatory Drug Design**

Mohamed K. Elgohary<sup>a, \*</sup>, Mahmoud Abdelrahman Alkabbani<sup>b</sup>, Aya Mohamed Ahmed Ibrahim<sup>c</sup>, Ahmed Elsonbaty<sup>a</sup>, Mayada H. Mohamed<sup>d</sup>, Abdulrahman A. Almehizia<sup>e</sup>, Ahmed M. Naglah<sup>e\*</sup>, Mohamed Fares<sup>a, f</sup>, Hatem A. Abdel-Aziz<sup>g</sup>

<sup>a</sup> *Pharmaceutical Chemistry Department, Faculty of Pharmacy, Egyptian Russian University, Badr City, Cairo, 11829, Egypt*

<sup>b</sup> *Pharmacology and Toxicology Department, Faculty of Pharmacy, Egyptian-Russian University, Badr City, Cairo, 11829, Egypt*

<sup>c</sup> *Department of Biochemistry, Faculty of Pharmacy, Egyptian Russian University, Badr City, Cairo, Egypt.*

<sup>d</sup> *University Family Medicine Center, Department of Family and Community Medicine, College of Medicine, King Saud University Medical City, P.O. Box 2925, Riyadh 11472, Saudi Arabia.*

<sup>e</sup> *Drug Exploration and Development Chair (DEDC), Department of Pharmaceutical Chemistry, College of Pharmacy, King Saud University, P.O. Box 2457, Riyadh 11451, Saudi Arabia.*

<sup>f</sup> *School of Pharmacy, The University of Sydney, Sydney, NSW, 2006, Australia*

<sup>g</sup> *Applied Organic Chemistry Department, National Research Center, Dokki, Cairo, 12622, Egypt*

**\*Corresponding author:** [mohamed-elgohary@eru.edu.eg](mailto:mohamed-elgohary@eru.edu.eg), [anaglah@ksu.edu.sa](mailto:anaglah@ksu.edu.sa),

# *Toxicity impact*

| Classification              | Target                                          | Shorthand  | Prediction | Probability |
|-----------------------------|-------------------------------------------------|------------|------------|-------------|
| Events                      | isoxazolepropionate receptor (AMPA)             |            |            |             |
| Molecular Initiating Events | Kainate receptor (KAR)                          | mie_kar    | Inactive   | 0.99        |
| Molecular Initiating Events | Achetylcholinesterase (AChE)                    | mie_ache   | Inactive   | 0.85        |
| Molecular Initiating Events | Constitutive androstane receptor (CAR)          | mie_car    | Inactive   | 0.99        |
| Molecular Initiating Events | Pregnane X receptor (PXR)                       | mie_pxr    | Inactive   | 0.83        |
| Molecular Initiating Events | NADH-quinone oxidoreductase (NADHox)            | mie_nadhox | Inactive   | 0.88        |
| Molecular Initiating Events | Voltage gated sodium channel (VGSC)             | mie_vgsc   | Inactive   | 0.77        |
| Molecular Initiating Events | Na <sup>+</sup> /I <sup>-</sup> symporter (NIS) | mie_nis    | Inactive   | 0.91        |
| Metabolism                  | Cytochrome CYP1A2                               | CYP1A2     | Inactive   | 0.83        |
| Metabolism                  | Cytochrome CYP2C19                              | CYP2C19    | Inactive   | 0.80        |
| Metabolism                  | Cytochrome CYP2C9                               | CYP2C9     | Inactive   | 0.69        |
| Metabolism                  | Cytochrome CYP2D6                               | CYP2D6     | Inactive   | 0.69        |
| Metabolism                  | Cytochrome CYP3A4                               | CYP3A4     | Inactive   | 0.66        |
| Metabolism                  | Cytochrome CYP2E1                               | CYP2E1     | Inactive   | 0.99        |

## ProTox-3.0 - Prediction of TOXicity of chemicals

| Classification                             | Target                                                                                 | Shorthand     | Prediction | Probability |
|--------------------------------------------|----------------------------------------------------------------------------------------|---------------|------------|-------------|
| Organ toxicity                             | Hepatotoxicity                                                                         | dili          | Inactive   | 0.56        |
| Organ toxicity                             | Neurotoxicity                                                                          | neuro         | Active     | 0.51        |
| Organ toxicity                             | Nephrotoxicity                                                                         | nephro        | Active     | 0.64        |
| Organ toxicity                             | Respiratory toxicity                                                                   | respi         | Active     | 0.75        |
| Organ toxicity                             | Cardiotoxicity                                                                         | cardio        | Inactive   | 0.50        |
| Toxicity end points                        | Carcinogenicity                                                                        | carcino       | Inactive   | 0.54        |
| Toxicity end points                        | Immunotoxicity                                                                         | immuno        | Active     | 0.61        |
| Toxicity end points                        | Mutagenicity                                                                           | mutagen       | Inactive   | 0.54        |
| Toxicity end points                        | Cytotoxicity                                                                           | cyto          | Inactive   | 0.65        |
| Toxicity end points                        | BBB-barrier                                                                            | bbb           | Inactive   | 0.67        |
| Toxicity end points                        | Ecotoxicity                                                                            | eco           | Inactive   | 0.75        |
| Toxicity end points                        | Clinical toxicity                                                                      | clinical      | Active     | 0.60        |
| Toxicity end points                        | Nutritional toxicity                                                                   | nutri         | Inactive   | 0.66        |
| Tox21-Nuclear receptor signalling pathways | Aryl hydrocarbon Receptor (AhR)                                                        | nr_ahr        | Inactive   | 0.76        |
| Tox21-Nuclear receptor signalling pathways | Androgen Receptor (AR)                                                                 | nr_ar         | Inactive   | 0.92        |
| Tox21-Nuclear receptor signalling pathways | Androgen Receptor Ligand Binding Domain (AR-LBD)                                       | nr_ar_lbd     | Inactive   | 0.99        |
| Tox21-Nuclear receptor signalling pathways | Aromatase                                                                              | nr_aromatase  | Inactive   | 0.97        |
| Tox21-Nuclear receptor signalling pathways | Estrogen Receptor Alpha (ER)                                                           | nr_er         | Inactive   | 0.89        |
| Tox21-Nuclear receptor signalling pathways | Estrogen Receptor Ligand Binding Domain (ER-LBD)                                       | nr_er_lbd     | Inactive   | 0.98        |
| Tox21-Nuclear receptor signalling pathways | Peroxisome Proliferator Activated Receptor Gamma (PPAR-Gamma)                          | nr_ppar_gamma | Inactive   | 0.97        |
| Tox21-Stress response pathways             | Nuclear factor (erythroid-derived 2)-like 2/ antioxidant responsive element (nrf2/ARE) | sr_are        | Inactive   | 0.92        |
| Tox21-Stress response pathways             | Heat shock factor response element (HSE)                                               | sr_hse        | Inactive   | 0.92        |
| Tox21-Stress response pathways             | Mitochondrial Membrane Potential (MMP)                                                 | sr_mmp        | Inactive   | 0.84        |
| Tox21-Stress response pathways             | Phosphoprotein (Tumor Suppressor) p53                                                  | sr_p53        | Inactive   | 0.94        |
| Tox21-Stress response pathways             | ATPase family AAA domain-containing protein 5 (ATAD5)                                  | sr_atad5      | Inactive   | 0.95        |
| Molecular Initiating Events                | Thyroid hormone receptor alpha (THR $\alpha$ )                                         | mie_thr_alpha | Active     | 0.57        |
| Molecular Initiating Events                | Thyroid hormone receptor beta (THR $\beta$ )                                           | mie_thr_beta  | Inactive   | 0.64        |
| Molecular Initiating Events                | Transthyretin (TTR)                                                                    | mie_ttr       | Inactive   | 0.64        |
| Molecular Initiating Events                | Ryanodine receptor (RYP)                                                               | mie_ryr       | Inactive   | 0.75        |
| Molecular Initiating Events                | GABA receptor (GABAR)                                                                  | mie_gabar     | Inactive   | 0.78        |
| Molecular Initiating Events                | Glutamate N-methyl-D-aspartate receptor (NMDAR)                                        | mie_nmdar     | Inactive   | 0.91        |
| Molecular Initiating Events                | alpha-amino-3-hydroxy-5-methyl-4-                                                      | mie_ampar     | Inactive   | 0.96        |

| Classification              | Target                                          | Shorthand  | Prediction | Probability |
|-----------------------------|-------------------------------------------------|------------|------------|-------------|
| Events                      | isoxazolepropionate receptor (AMPA)             |            |            |             |
| Molecular Initiating Events | Kainate receptor (KAR)                          | mie_kar    | Inactive   | 0.98        |
| Molecular Initiating Events | Achetylcholinesterase (AChE)                    | mie_ache   | Inactive   | 0.87        |
| Molecular Initiating Events | Constitutive androstane receptor (CAR)          | mie_car    | Inactive   | 0.99        |
| Molecular Initiating Events | Pregnane X receptor (PXR)                       | mie_pxr    | Inactive   | 0.84        |
| Molecular Initiating Events | NADH-quinone oxidoreductase (NADHox)            | mie_nadhox | Inactive   | 0.92        |
| Molecular Initiating Events | Voltage gated sodium channel (VGSC)             | mie_vgsc   | Inactive   | 0.77        |
| Molecular Initiating Events | Na <sup>+</sup> /I <sup>-</sup> symporter (NIS) | mie_nis    | Inactive   | 0.92        |
| Metabolism                  | Cytochrome CYP1A2                               | CYP1A2     | Inactive   | 0.82        |
| Metabolism                  | Cytochrome CYP2C19                              | CYP2C19    | Inactive   | 0.78        |
| Metabolism                  | Cytochrome CYP2C9                               | CYP2C9     | Inactive   | 0.63        |
| Metabolism                  | Cytochrome CYP2D6                               | CYP2D6     | Inactive   | 0.68        |
| Metabolism                  | Cytochrome CYP3A4                               | CYP3A4     | Inactive   | 0.69        |
| Metabolism                  | Cytochrome CYP2E1                               | CYP2E1     | Inactive   | 0.99        |

## ProTox-3.0 - Prediction of TOXicity of chemicals

| Classification                             | Target                                                                                 | Shorthand     | Prediction | Probability |
|--------------------------------------------|----------------------------------------------------------------------------------------|---------------|------------|-------------|
| Organ toxicity                             | Hepatotoxicity                                                                         | dili          | Inactive   | 0.58        |
| Organ toxicity                             | Neurotoxicity                                                                          | neuro         | Inactive   | 0.5         |
| Organ toxicity                             | Nephrotoxicity                                                                         | nephro        | Active     | 0.70        |
| Organ toxicity                             | Respiratory toxicity                                                                   | respi         | Active     | 0.73        |
| Organ toxicity                             | Cardiotoxicity                                                                         | cardio        | Inactive   | 0.54        |
| Toxicity end points                        | Carcinogenicity                                                                        | carcino       | Inactive   | 0.64        |
| Toxicity end points                        | Immunotoxicity                                                                         | immuno        | Active     | 0.85        |
| Toxicity end points                        | Mutagenicity                                                                           | mutagen       | Inactive   | 0.59        |
| Toxicity end points                        | Cytotoxicity                                                                           | cyto          | Inactive   | 0.63        |
| Toxicity end points                        | BBB-barrier                                                                            | bbb           | Inactive   | 0.52        |
| Toxicity end points                        | Ecotoxicity                                                                            | eco           | Inactive   | 0.72        |
| Toxicity end points                        | Clinical toxicity                                                                      | clinical      | Active     | 0.61        |
| Toxicity end points                        | Nutritional toxicity                                                                   | nutri         | Inactive   | 0.65        |
| Tox21-Nuclear receptor signalling pathways | Aryl hydrocarbon Receptor (AhR)                                                        | nr_ahr        | Inactive   | 0.80        |
| Tox21-Nuclear receptor signalling pathways | Androgen Receptor (AR)                                                                 | nr_ar         | Inactive   | 0.93        |
| Tox21-Nuclear receptor signalling pathways | Androgen Receptor Ligand Binding Domain (AR-LBD)                                       | nr_ar_lbd     | Inactive   | 0.99        |
| Tox21-Nuclear receptor signalling pathways | Aromatase                                                                              | nr_aromatase  | Inactive   | 0.92        |
| Tox21-Nuclear receptor signalling pathways | Estrogen Receptor Alpha (ER)                                                           | nr_er         | Inactive   | 0.87        |
| Tox21-Nuclear receptor signalling pathways | Estrogen Receptor Ligand Binding Domain (ER-LBD)                                       | nr_er_lbd     | Inactive   | 0.98        |
| Tox21-Nuclear receptor signalling pathways | Peroxisome Proliferator Activated Receptor Gamma (PPAR-Gamma)                          | nr_ppar_gamma | Inactive   | 0.92        |
| Tox21-Stress response pathways             | Nuclear factor (erythroid-derived 2)-like 2/ antioxidant responsive element (nrf2/ARE) | sr_are        | Inactive   | 0.89        |
| Tox21-Stress response pathways             | Heat shock factor response element (HSE)                                               | sr_hse        | Inactive   | 0.89        |
| Tox21-Stress response pathways             | Mitochondrial Membrane Potential (MMP)                                                 | sr_mmp        | Inactive   | 0.84        |
| Tox21-Stress response pathways             | Phosphoprotein (Tumor Suppressor) p53                                                  | sr_p53        | Inactive   | 0.91        |
| Tox21-Stress response pathways             | ATPase family AAA domain-containing protein 5 (ATAD5)                                  | sr_atad5      | Inactive   | 0.95        |
| Molecular Initiating Events                | Thyroid hormone receptor alpha (THR $\alpha$ )                                         | mie_thr_alpha | Active     | 0.64        |
| Molecular Initiating Events                | Thyroid hormone receptor beta (THR $\beta$ )                                           | mie_thr_beta  | Inactive   | 0.61        |
| Molecular Initiating Events                | Transthyretin (TTR)                                                                    | mie_ttr       | Inactive   | 0.68        |
| Molecular Initiating Events                | Ryanodine receptor (RYP)                                                               | mie_ryr       | Inactive   | 0.73        |
| Molecular Initiating Events                | GABA receptor (GABAR)                                                                  | mie_gabar     | Inactive   | 0.79        |
| Molecular Initiating Events                | Glutamate N-methyl-D-aspartate receptor (NMDAR)                                        | mie_nmdar     | Inactive   | 0.93        |
| Molecular Initiating Events                | alpha-amino-3-hydroxy-5-methyl-4-                                                      | mie_ampar     | Inactive   | 0.97        |

| Classification              | Target                                          | Shorthand  | Prediction | Probability |
|-----------------------------|-------------------------------------------------|------------|------------|-------------|
| Events                      | isoxazolepropionate receptor (AMPA)             |            |            |             |
| Molecular Initiating Events | Kainate receptor (KAR)                          | mie_kar    | Inactive   | 0.99        |
| Molecular Initiating Events | Achetylcholinesterase (AChE)                    | mie_ache   | Inactive   | 0.83        |
| Molecular Initiating Events | Constitutive androstane receptor (CAR)          | mie_car    | Inactive   | 0.99        |
| Molecular Initiating Events | Pregnane X receptor (PXR)                       | mie_pxr    | Inactive   | 0.84        |
| Molecular Initiating Events | NADH-quinone oxidoreductase (NADHox)            | mie_nadhox | Inactive   | 0.91        |
| Molecular Initiating Events | Voltage gated sodium channel (VGSC)             | mie_vgsc   | Inactive   | 0.75        |
| Molecular Initiating Events | Na <sup>+</sup> /I <sup>-</sup> symporter (NIS) | mie_nis    | Inactive   | 0.92        |
| Metabolism                  | Cytochrome CYP1A2                               | CYP1A2     | Inactive   | 0.84        |
| Metabolism                  | Cytochrome CYP2C19                              | CYP2C19    | Inactive   | 0.83        |
| Metabolism                  | Cytochrome CYP2C9                               | CYP2C9     | Inactive   | 0.73        |
| Metabolism                  | Cytochrome CYP2D6                               | CYP2D6     | Inactive   | 0.70        |
| Metabolism                  | Cytochrome CYP3A4                               | CYP3A4     | Inactive   | 0.69        |
| Metabolism                  | Cytochrome CYP2E1                               | CYP2E1     | Inactive   | 0.99        |

## ProTox-3.0 - Prediction of TOXicity of chemicals

| Classification                             | Target                                                                                 | Shorthand     | Prediction | Probability |
|--------------------------------------------|----------------------------------------------------------------------------------------|---------------|------------|-------------|
| Organ toxicity                             | Hepatotoxicity                                                                         | dili          | Inactive   | 0.58        |
| Organ toxicity                             | Neurotoxicity                                                                          | neuro         | Active     | 0.51        |
| Organ toxicity                             | Nephrotoxicity                                                                         | nephro        | Active     | 0.66        |
| Organ toxicity                             | Respiratory toxicity                                                                   | respi         | Active     | 0.72        |
| Organ toxicity                             | Cardiotoxicity                                                                         | cardio        | Inactive   | 0.51        |
| Toxicity end points                        | Carcinogenicity                                                                        | carcino       | Inactive   | 0.57        |
| Toxicity end points                        | Immunotoxicity                                                                         | immuno        | Active     | 0.61        |
| Toxicity end points                        | Mutagenicity                                                                           | mutagen       | Inactive   | 0.52        |
| Toxicity end points                        | Cytotoxicity                                                                           | cyto          | Inactive   | 0.62        |
| Toxicity end points                        | BBB-barrier                                                                            | bbb           | Inactive   | 0.66        |
| Toxicity end points                        | Ecotoxicity                                                                            | eco           | Inactive   | 0.75        |
| Toxicity end points                        | Clinical toxicity                                                                      | clinical      | Active     | 0.61        |
| Toxicity end points                        | Nutritional toxicity                                                                   | nutri         | Inactive   | 0.68        |
| Tox21-Nuclear receptor signalling pathways | Aryl hydrocarbon Receptor (AhR)                                                        | nr_ahr        | Inactive   | 0.80        |
| Tox21-Nuclear receptor signalling pathways | Androgen Receptor (AR)                                                                 | nr_ar         | Inactive   | 0.90        |
| Tox21-Nuclear receptor signalling pathways | Androgen Receptor Ligand Binding Domain (AR-LBD)                                       | nr_ar_lbd     | Inactive   | 0.99        |
| Tox21-Nuclear receptor signalling pathways | Aromatase                                                                              | nr_aromatase  | Inactive   | 0.96        |
| Tox21-Nuclear receptor signalling pathways | Estrogen Receptor Alpha (ER)                                                           | nr_er         | Inactive   | 0.86        |
| Tox21-Nuclear receptor signalling pathways | Estrogen Receptor Ligand Binding Domain (ER-LBD)                                       | nr_er_lbd     | Inactive   | 0.98        |
| Tox21-Nuclear receptor signalling pathways | Peroxisome Proliferator Activated Receptor Gamma (PPAR-Gamma)                          | nr_ppar_gamma | Inactive   | 0.97        |
| Tox21-Stress response pathways             | Nuclear factor (erythroid-derived 2)-like 2/ antioxidant responsive element (nrf2/ARE) | sr_are        | Inactive   | 0.90        |
| Tox21-Stress response pathways             | Heat shock factor response element (HSE)                                               | sr_hse        | Inactive   | 0.90        |
| Tox21-Stress response pathways             | Mitochondrial Membrane Potential (MMP)                                                 | sr_mmp        | Inactive   | 0.83        |
| Tox21-Stress response pathways             | Phosphoprotein (Tumor Suppressor) p53                                                  | sr_p53        | Inactive   | 0.92        |
| Tox21-Stress response pathways             | ATPase family AAA domain-containing protein 5 (ATAD5)                                  | sr_atad5      | Inactive   | 0.94        |
| Molecular Initiating Events                | Thyroid hormone receptor alpha (THR $\alpha$ )                                         | mie_thr_alpha | Active     | 0.59        |
| Molecular Initiating Events                | Thyroid hormone receptor beta (THR $\beta$ )                                           | mie_thr_beta  | Inactive   | 0.62        |
| Molecular Initiating Events                | Transthyretin (TTR)                                                                    | mie_ttr       | Inactive   | 0.67        |
| Molecular Initiating Events                | Ryanodine receptor (RYP)                                                               | mie_ryr       | Inactive   | 0.76        |
| Molecular Initiating Events                | GABA receptor (GABAR)                                                                  | mie_gabar     | Inactive   | 0.74        |
| Molecular Initiating Events                | Glutamate N-methyl-D-aspartate receptor (NMDAR)                                        | mie_nmdar     | Inactive   | 0.92        |
| Molecular Initiating Events                | alpha-amino-3-hydroxy-5-methyl-4-                                                      | mie_ampar     | Inactive   | 0.96        |

| Classification              | Target                                          | Shorthand  | Prediction | Probability |
|-----------------------------|-------------------------------------------------|------------|------------|-------------|
| Events                      | isoxazolepropionate receptor (AMPA)             |            |            |             |
| Molecular Initiating Events | Kainate receptor (KAR)                          | mie_kar    | Inactive   | 0.99        |
| Molecular Initiating Events | Achetylcholinesterase (AChE)                    | mie_ache   | Inactive   | 0.96        |
| Molecular Initiating Events | Constitutive androstane receptor (CAR)          | mie_car    | Inactive   | 1.0         |
| Molecular Initiating Events | Pregnane X receptor (PXR)                       | mie_pxr    | Inactive   | 0.86        |
| Molecular Initiating Events | NADH-quinone oxidoreductase (NADHox)            | mie_nadhox | Inactive   | 0.92        |
| Molecular Initiating Events | Voltage gated sodium channel (VGSC)             | mie_vgsc   | Inactive   | 0.85        |
| Molecular Initiating Events | Na <sup>+</sup> /I <sup>-</sup> symporter (NIS) | mie_nis    | Inactive   | 0.93        |
| Metabolism                  | Cytochrome CYP1A2                               | CYP1A2     | Inactive   | 0.79        |
| Metabolism                  | Cytochrome CYP2C19                              | CYP2C19    | Inactive   | 0.74        |
| Metabolism                  | Cytochrome CYP2C9                               | CYP2C9     | Active     | 0.57        |
| Metabolism                  | Cytochrome CYP2D6                               | CYP2D6     | Inactive   | 0.69        |
| Metabolism                  | Cytochrome CYP3A4                               | CYP3A4     | Inactive   | 0.70        |
| Metabolism                  | Cytochrome CYP2E1                               | CYP2E1     | Inactive   | 0.99        |

## ProTox-3.0 - Prediction of TOXicity of chemicals

| Classification                             | Target                                                                                 | Shorthand     | Prediction | Probability |
|--------------------------------------------|----------------------------------------------------------------------------------------|---------------|------------|-------------|
| Organ toxicity                             | Hepatotoxicity                                                                         | dili          | Active     | 0.52        |
| Organ toxicity                             | Neurotoxicity                                                                          | neuro         | Inactive   | 0.62        |
| Organ toxicity                             | Nephrotoxicity                                                                         | nephro        | Active     | 0.72        |
| Organ toxicity                             | Respiratory toxicity                                                                   | respi         | Active     | 0.52        |
| Organ toxicity                             | Cardiotoxicity                                                                         | cardio        | Inactive   | 0.54        |
| Toxicity end points                        | Carcinogenicity                                                                        | carcino       | Inactive   | 0.55        |
| Toxicity end points                        | Immunotoxicity                                                                         | immuno        | Active     | 0.92        |
| Toxicity end points                        | Mutagenicity                                                                           | mutagen       | Inactive   | 0.63        |
| Toxicity end points                        | Cytotoxicity                                                                           | cyto          | Inactive   | 0.66        |
| Toxicity end points                        | BBB-barrier                                                                            | bbb           | Active     | 0.55        |
| Toxicity end points                        | Ecotoxicity                                                                            | eco           | Inactive   | 0.79        |
| Toxicity end points                        | Clinical toxicity                                                                      | clinical      | Active     | 0.58        |
| Toxicity end points                        | Nutritional toxicity                                                                   | nutri         | Inactive   | 0.61        |
| Tox21-Nuclear receptor signalling pathways | Aryl hydrocarbon Receptor (AhR)                                                        | nr_ahr        | Inactive   | 0.64        |
| Tox21-Nuclear receptor signalling pathways | Androgen Receptor (AR)                                                                 | nr_ar         | Inactive   | 0.97        |
| Tox21-Nuclear receptor signalling pathways | Androgen Receptor Ligand Binding Domain (AR-LBD)                                       | nr_ar_lbd     | Inactive   | 0.99        |
| Tox21-Nuclear receptor signalling pathways | Aromatase                                                                              | nr_aromatase  | Inactive   | 0.93        |
| Tox21-Nuclear receptor signalling pathways | Estrogen Receptor Alpha (ER)                                                           | nr_er         | Inactive   | 0.88        |
| Tox21-Nuclear receptor signalling pathways | Estrogen Receptor Ligand Binding Domain (ER-LBD)                                       | nr_er_lbd     | Inactive   | 0.98        |
| Tox21-Nuclear receptor signalling pathways | Peroxisome Proliferator Activated Receptor Gamma (PPAR-Gamma)                          | nr_ppar_gamma | Inactive   | 0.77        |
| Tox21-Stress response pathways             | Nuclear factor (erythroid-derived 2)-like 2/ antioxidant responsive element (nrf2/ARE) | sr_are        | Inactive   | 0.88        |
| Tox21-Stress response pathways             | Heat shock factor response element (HSE)                                               | sr_hse        | Inactive   | 0.88        |
| Tox21-Stress response pathways             | Mitochondrial Membrane Potential (MMP)                                                 | sr_mmp        | Inactive   | 0.77        |
| Tox21-Stress response pathways             | Phosphoprotein (Tumor Suppressor) p53                                                  | sr_p53        | Inactive   | 0.82        |
| Tox21-Stress response pathways             | ATPase family AAA domain-containing protein 5 (ATAD5)                                  | sr_atad5      | Inactive   | 0.94        |
| Molecular Initiating Events                | Thyroid hormone receptor alpha (THR $\alpha$ )                                         | mie_thr_alpha | Active     | 0.74        |
| Molecular Initiating Events                | Thyroid hormone receptor beta (THR $\beta$ )                                           | mie_thr_beta  | Inactive   | 0.57        |
| Molecular Initiating Events                | Transthyretin (TTR)                                                                    | mie_ttr       | Inactive   | 0.57        |
| Molecular Initiating Events                | Ryanodine receptor (RYP)                                                               | mie_ryr       | Inactive   | 0.84        |
| Molecular Initiating Events                | GABA receptor (GABAR)                                                                  | mie_gabar     | Inactive   | 0.88        |
| Molecular Initiating Events                | Glutamate N-methyl-D-aspartate receptor (NMDAR)                                        | mie_nmdar     | Inactive   | 0.98        |
| Molecular Initiating Events                | alpha-amino-3-hydroxy-5-methyl-4-                                                      | mie_ampar     | Inactive   | 0.99        |

| Classification              | Target                                          | Shorthand  | Prediction | Probability |
|-----------------------------|-------------------------------------------------|------------|------------|-------------|
| Events                      | isoxazolepropionate receptor (AMPA)             |            |            |             |
| Molecular Initiating Events | Kainate receptor (KAR)                          | mie_kar    | Inactive   | 1.0         |
| Molecular Initiating Events | Achetylcholinesterase (AChE)                    | mie_ache   | Inactive   | 0.95        |
| Molecular Initiating Events | Constitutive androstane receptor (CAR)          | mie_car    | Inactive   | 1.0         |
| Molecular Initiating Events | Pregnane X receptor (PXR)                       | mie_pxr    | Inactive   | 0.83        |
| Molecular Initiating Events | NADH-quinone oxidoreductase (NADHox)            | mie_nadhox | Inactive   | 0.89        |
| Molecular Initiating Events | Voltage gated sodium channel (VGSC)             | mie_vgsc   | Inactive   | 0.83        |
| Molecular Initiating Events | Na <sup>+</sup> /I <sup>-</sup> symporter (NIS) | mie_nis    | Inactive   | 0.93        |
| Metabolism                  | Cytochrome CYP1A2                               | CYP1A2     | Inactive   | 0.81        |
| Metabolism                  | Cytochrome CYP2C19                              | CYP2C19    | Inactive   | 0.76        |
| Metabolism                  | Cytochrome CYP2C9                               | CYP2C9     | Inactive   | 0.55        |
| Metabolism                  | Cytochrome CYP2D6                               | CYP2D6     | Inactive   | 0.72        |
| Metabolism                  | Cytochrome CYP3A4                               | CYP3A4     | Inactive   | 0.63        |
| Metabolism                  | Cytochrome CYP2E1                               | CYP2E1     | Inactive   | 1.0         |

## ProTox-3.0 - Prediction of TOXicity of chemicals

| Classification                             | Target                                                                         | Shorthand     | Prediction | Probability |
|--------------------------------------------|--------------------------------------------------------------------------------|---------------|------------|-------------|
| Organ toxicity                             | Hepatotoxicity                                                                 | dili          | Active     | 0.52        |
| Organ toxicity                             | Neurotoxicity                                                                  | neuro         | Inactive   | 0.62        |
| Organ toxicity                             | Nephrotoxicity                                                                 | nephro        | Active     | 0.68        |
| Organ toxicity                             | Respiratory toxicity                                                           | respi         | Inactive   | 0.50        |
| Organ toxicity                             | Cardiotoxicity                                                                 | cardio        | Active     | 0.50        |
| Toxicity end points                        | Carcinogenicity                                                                | carcino       | Active     | 0.52        |
| Toxicity end points                        | Immunotoxicity                                                                 | immuno        | Active     | 0.60        |
| Toxicity end points                        | Mutagenicity                                                                   | mutagen       | Inactive   | 0.52        |
| Toxicity end points                        | Cytotoxicity                                                                   | cyto          | Inactive   | 0.67        |
| Toxicity end points                        | BBB-barrier                                                                    | bbb           | Inactive   | 0.56        |
| Toxicity end points                        | Ecotoxicity                                                                    | eco           | Inactive   | 0.80        |
| Toxicity end points                        | Clinical toxicity                                                              | clinical      | Active     | 0.58        |
| Toxicity end points                        | Nutritional toxicity                                                           | nutri         | Inactive   | 0.62        |
| Tox21-Nuclear receptor signalling pathways | Aryl hydrocarbon Receptor (AhR)                                                | nr_ahr        | Inactive   | 0.58        |
| Tox21-Nuclear receptor signalling pathways | Androgen Receptor (AR)                                                         | nr_ar         | Inactive   | 0.96        |
| Tox21-Nuclear receptor signalling pathways | Androgen Receptor Ligand Binding Domain (AR-LBD)                               | nr_ar_lbd     | Inactive   | 0.99        |
| Tox21-Nuclear receptor signalling pathways | Aromatase                                                                      | nr_aromatase  | Inactive   | 0.97        |
| Tox21-Nuclear receptor signalling pathways | Estrogen Receptor Alpha (ER)                                                   | nr_er         | Inactive   | 0.87        |
| Tox21-Nuclear receptor signalling pathways | Estrogen Receptor Ligand Binding Domain (ER-LBD)                               | nr_er_lbd     | Inactive   | 0.98        |
| Tox21-Nuclear receptor signalling pathways | Peroxisome Proliferator Activated Receptor Gamma (PPAR-Gamma)                  | nr_ppar_gamma | Inactive   | 0.89        |
| Tox21-Stress response pathways             | Nuclear factor (erythroid-derived 2)/antioxidant responsive element (nrf2/ARE) | sr_are        | Inactive   | 0.89        |
| Tox21-Stress response pathways             | Heat shock factor response element (HSE)                                       | sr_hse        | Inactive   | 0.89        |
| Tox21-Stress response pathways             | Mitochondrial Membrane Potential (MMP)                                         | sr_mmp        | Inactive   | 0.80        |
| Tox21-Stress response pathways             | Phosphoprotein (Tumor Suppressor) p53                                          | sr_p53        | Inactive   | 0.90        |
| Tox21-Stress response pathways             | ATPase family AAA domain-containing protein 5 (ATAD5)                          | sr_atad5      | Inactive   | 0.93        |
| Molecular Initiating Events                | Thyroid hormone receptor alpha (THR $\alpha$ )                                 | mie_thr_alpha | Active     | 0.67        |
| Molecular Initiating Events                | Thyroid hormone receptor beta (THR $\beta$ )                                   | mie_thr_beta  | Inactive   | 0.52        |
| Molecular Initiating Events                | Transthyretin (TTR)                                                            | mie_ttr       | Inactive   | 0.59        |
| Molecular Initiating Events                | Ryanodine receptor (RYP)                                                       | mie_ryr       | Inactive   | 0.86        |
| Molecular Initiating Events                | GABA receptor (GABAR)                                                          | mie_gabar     | Inactive   | 0.78        |
| Molecular Initiating Events                | Glutamate N-methyl-D-aspartate receptor (NMDAR)                                | mie_nmdar     | Inactive   | 0.98        |
| Molecular Initiating Events                | alpha-amino-3-hydroxy-5-methyl-4-                                              | mie_ampar     | Inactive   | 0.99        |

| Classification              | Target                                          | Shorthand  | Prediction | Probability |
|-----------------------------|-------------------------------------------------|------------|------------|-------------|
| Events                      | isoxazolepropionate receptor (AMPA)             |            |            |             |
| Molecular Initiating Events | Kainate receptor (KAR)                          | mie_kar    | Inactive   | 0.99        |
| Molecular Initiating Events | Achetylcholinesterase (AChE)                    | mie_ache   | Inactive   | 0.95        |
| Molecular Initiating Events | Constitutive androstane receptor (CAR)          | mie_car    | Inactive   | 1.0         |
| Molecular Initiating Events | Pregnane X receptor (PXR)                       | mie_pxr    | Inactive   | 0.85        |
| Molecular Initiating Events | NADH-quinone oxidoreductase (NADHox)            | mie_nadhox | Inactive   | 0.90        |
| Molecular Initiating Events | Voltage gated sodium channel (VGSC)             | mie_vgsc   | Inactive   | 0.82        |
| Molecular Initiating Events | Na <sup>+</sup> /I <sup>-</sup> symporter (NIS) | mie_nis    | Inactive   | 0.93        |
| Metabolism                  | Cytochrome CYP1A2                               | CYP1A2     | Inactive   | 0.79        |
| Metabolism                  | Cytochrome CYP2C19                              | CYP2C19    | Inactive   | 0.76        |
| Metabolism                  | Cytochrome CYP2C9                               | CYP2C9     | Inactive   | 0.56        |
| Metabolism                  | Cytochrome CYP2D6                               | CYP2D6     | Inactive   | 0.72        |
| Metabolism                  | Cytochrome CYP3A4                               | CYP3A4     | Inactive   | 0.68        |
| Metabolism                  | Cytochrome CYP2E1                               | CYP2E1     | Inactive   | 0.99        |

## ProTox-3.0 - Prediction of TOXicity of chemicals

| Classification                             | Target                                                                         | Shorthand     | Prediction | Probability |
|--------------------------------------------|--------------------------------------------------------------------------------|---------------|------------|-------------|
| Organ toxicity                             | Hepatotoxicity                                                                 | dili          | Active     | 0.53        |
| Organ toxicity                             | Neurotoxicity                                                                  | neuro         | Inactive   | 0.64        |
| Organ toxicity                             | Nephrotoxicity                                                                 | nephro        | Active     | 0.69        |
| Organ toxicity                             | Respiratory toxicity                                                           | respi         | Active     | 0.51        |
| Organ toxicity                             | Cardiotoxicity                                                                 | cardio        | Active     | 0.50        |
| Toxicity end points                        | Carcinogenicity                                                                | carcino       | Active     | 0.53        |
| Toxicity end points                        | Immunotoxicity                                                                 | immuno        | Active     | 0.79        |
| Toxicity end points                        | Mutagenicity                                                                   | mutagen       | Inactive   | 0.50        |
| Toxicity end points                        | Cytotoxicity                                                                   | cyto          | Inactive   | 0.67        |
| Toxicity end points                        | BBB-barrier                                                                    | bbb           | Inactive   | 0.55        |
| Toxicity end points                        | Ecotoxicity                                                                    | eco           | Inactive   | 0.81        |
| Toxicity end points                        | Clinical toxicity                                                              | clinical      | Active     | 0.60        |
| Toxicity end points                        | Nutritional toxicity                                                           | nutri         | Inactive   | 0.63        |
| Tox21-Nuclear receptor signalling pathways | Aryl hydrocarbon Receptor (AhR)                                                | nr_ahr        | Inactive   | 0.59        |
| Tox21-Nuclear receptor signalling pathways | Androgen Receptor (AR)                                                         | nr_ar         | Inactive   | 0.96        |
| Tox21-Nuclear receptor signalling pathways | Androgen Receptor Ligand Binding Domain (AR-LBD)                               | nr_ar_lbd     | Inactive   | 0.99        |
| Tox21-Nuclear receptor signalling pathways | Aromatase                                                                      | nr_aromatase  | Inactive   | 0.97        |
| Tox21-Nuclear receptor signalling pathways | Estrogen Receptor Alpha (ER)                                                   | nr_er         | Inactive   | 0.86        |
| Tox21-Nuclear receptor signalling pathways | Estrogen Receptor Ligand Binding Domain (ER-LBD)                               | nr_er_lbd     | Inactive   | 0.98        |
| Tox21-Nuclear receptor signalling pathways | Peroxisome Proliferator Activated Receptor Gamma (PPAR-Gamma)                  | nr_ppar_gamma | Inactive   | 0.90        |
| Tox21-Stress response pathways             | Nuclear factor (erythroid-derived 2)/antioxidant responsive element (nrf2/ARE) | sr_are        | Inactive   | 0.90        |
| Tox21-Stress response pathways             | Heat shock factor response element (HSE)                                       | sr_hse        | Inactive   | 0.90        |
| Tox21-Stress response pathways             | Mitochondrial Membrane Potential (MMP)                                         | sr_mmp        | Inactive   | 0.80        |
| Tox21-Stress response pathways             | Phosphoprotein (Tumor Suppressor) p53                                          | sr_p53        | Inactive   | 0.91        |
| Tox21-Stress response pathways             | ATPase family AAA domain-containing protein 5 (ATAD5)                          | sr_atad5      | Inactive   | 0.91        |
| Molecular Initiating Events                | Thyroid hormone receptor alpha (THR $\alpha$ )                                 | mie_thr_alpha | Active     | 0.65        |
| Molecular Initiating Events                | Thyroid hormone receptor beta (THR $\beta$ )                                   | mie_thr_beta  | Inactive   | 0.57        |
| Molecular Initiating Events                | Transthyretin (TTR)                                                            | mie_ttr       | Inactive   | 0.56        |
| Molecular Initiating Events                | Ryanodine receptor (RYP)                                                       | mie_ryr       | Inactive   | 0.86        |
| Molecular Initiating Events                | GABA receptor (GABAR)                                                          | mie_gabar     | Inactive   | 0.79        |
| Molecular Initiating Events                | Glutamate N-methyl-D-aspartate receptor (NMDAR)                                | mie_nmdar     | Inactive   | 0.98        |
| Molecular Initiating Events                | alpha-amino-3-hydroxy-5-methyl-4-                                              | mie_ampar     | Inactive   | 0.99        |



## ProTox-3.0 - Prediction of TOXicity of chemicals

| Classification                             | Target                                                                         | Shorthand     | Prediction | Probability |
|--------------------------------------------|--------------------------------------------------------------------------------|---------------|------------|-------------|
| Organ toxicity                             | Hepatotoxicity                                                                 | dili          | Active     | 0.52        |
| Organ toxicity                             | Neurotoxicity                                                                  | neuro         | Inactive   | 0.60        |
| Organ toxicity                             | Nephrotoxicity                                                                 | nephro        | Active     | 0.69        |
| Organ toxicity                             | Respiratory toxicity                                                           | respi         | Active     | 0.57        |
| Organ toxicity                             | Cardiotoxicity                                                                 | cardio        | Active     | 0.51        |
| Toxicity end points                        | Carcinogenicity                                                                | carcino       | Active     | 0.53        |
| Toxicity end points                        | Immunotoxicity                                                                 | immuno        | Inactive   | 0.80        |
| Toxicity end points                        | Mutagenicity                                                                   | mutagen       | Inactive   | 0.50        |
| Toxicity end points                        | Cytotoxicity                                                                   | cyto          | Inactive   | 0.66        |
| Toxicity end points                        | BBB-barrier                                                                    | bbb           | Inactive   | 0.55        |
| Toxicity end points                        | Ecotoxicity                                                                    | eco           | Inactive   | 0.80        |
| Toxicity end points                        | Clinical toxicity                                                              | clinical      | Active     | 0.61        |
| Toxicity end points                        | Nutritional toxicity                                                           | nutri         | Inactive   | 0.63        |
| Tox21-Nuclear receptor signalling pathways | Aryl hydrocarbon Receptor (AhR)                                                | nr_ahr        | Inactive   | 0.62        |
| Tox21-Nuclear receptor signalling pathways | Androgen Receptor (AR)                                                         | nr_ar         | Inactive   | 0.96        |
| Tox21-Nuclear receptor signalling pathways | Androgen Receptor Ligand Binding Domain (AR-LBD)                               | nr_ar_lbd     | Inactive   | 0.99        |
| Tox21-Nuclear receptor signalling pathways | Aromatase                                                                      | nr_aromatase  | Inactive   | 0.98        |
| Tox21-Nuclear receptor signalling pathways | Estrogen Receptor Alpha (ER)                                                   | nr_er         | Inactive   | 0.88        |
| Tox21-Nuclear receptor signalling pathways | Estrogen Receptor Ligand Binding Domain (ER-LBD)                               | nr_er_lbd     | Inactive   | 0.98        |
| Tox21-Nuclear receptor signalling pathways | Peroxisome Proliferator Activated Receptor Gamma (PPAR-Gamma)                  | nr_ppar_gamma | Inactive   | 0.90        |
| Tox21-Stress response pathways             | Nuclear factor (erythroid-derived 2)/antioxidant responsive element (nrf2/ARE) | sr_are        | Inactive   | 0.93        |
| Tox21-Stress response pathways             | Heat shock factor response element (HSE)                                       | sr_hse        | Inactive   | 0.93        |
| Tox21-Stress response pathways             | Mitochondrial Membrane Potential (MMP)                                         | sr_mmp        | Inactive   | 0.82        |
| Tox21-Stress response pathways             | Phosphoprotein (Tumor Suppressor) p53                                          | sr_p53        | Inactive   | 0.90        |
| Tox21-Stress response pathways             | ATPase family AAA domain-containing protein 5 (ATAD5)                          | sr_atad5      | Inactive   | 0.91        |
| Molecular Initiating Events                | Thyroid hormone receptor alpha (THR $\alpha$ )                                 | mie_thr_alpha | Active     | 0.64        |
| Molecular Initiating Events                | Thyroid hormone receptor beta (THR $\beta$ )                                   | mie_thr_beta  | Inactive   | 0.58        |
| Molecular Initiating Events                | Transthyretin (TTR)                                                            | mie_ttr       | Inactive   | 0.65        |
| Molecular Initiating Events                | Ryanodine receptor (RYP)                                                       | mie_ryr       | Inactive   | 0.84        |
| Molecular Initiating Events                | GABA receptor (GABAR)                                                          | mie_gabar     | Inactive   | 0.77        |
| Molecular Initiating Events                | Glutamate N-methyl-D-aspartate receptor (NMDAR)                                | mie_nmdar     | Inactive   | 0.98        |
| Molecular Initiating Events                | alpha-amino-3-hydroxy-5-methyl-4-                                              | mie_ampar     | Inactive   | 0.99        |

| Classification              | Target                                          | Shorthand  | Prediction | Probability |
|-----------------------------|-------------------------------------------------|------------|------------|-------------|
| Events                      | isoxazolepropionate receptor (AMPA)             |            |            |             |
| Molecular Initiating Events | Kainate receptor (KAR)                          | mie_kar    | Inactive   | 0.99        |
| Molecular Initiating Events | Achetylcholinesterase (AChE)                    | mie_ache   | Inactive   | 0.93        |
| Molecular Initiating Events | Constitutive androstane receptor (CAR)          | mie_car    | Inactive   | 1.0         |
| Molecular Initiating Events | Pregnane X receptor (PXR)                       | mie_pxr    | Inactive   | 0.84        |
| Molecular Initiating Events | NADH-quinone oxidoreductase (NADHOX)            | mie_nadhox | Inactive   | 0.88        |
| Molecular Initiating Events | Voltage gated sodium channel (VGSC)             | mie_vgsc   | Inactive   | 0.82        |
| Molecular Initiating Events | Na <sup>+</sup> /I <sup>-</sup> symporter (NIS) | mie_nis    | Inactive   | 0.93        |
| Metabolism                  | Cytochrome CYP1A2                               | CYP1A2     | Inactive   | 0.82        |
| Metabolism                  | Cytochrome CYP2C19                              | CYP2C19    | Inactive   | 0.74        |
| Metabolism                  | Cytochrome CYP2C9                               | CYP2C9     | Inactive   | 0.57        |
| Metabolism                  | Cytochrome CYP2D6                               | CYP2D6     | Inactive   | 0.73        |
| Metabolism                  | Cytochrome CYP3A4                               | CYP3A4     | Inactive   | 0.67        |
| Metabolism                  | Cytochrome CYP2E1                               | CYP2E1     | Inactive   | 0.99        |

**Figure S1:** Toxicity impact of designed compounds **5d-f**, **7b**, **10d, e**, and **13b** using ProTox 3.0 program.

# *Molecular docking survey*

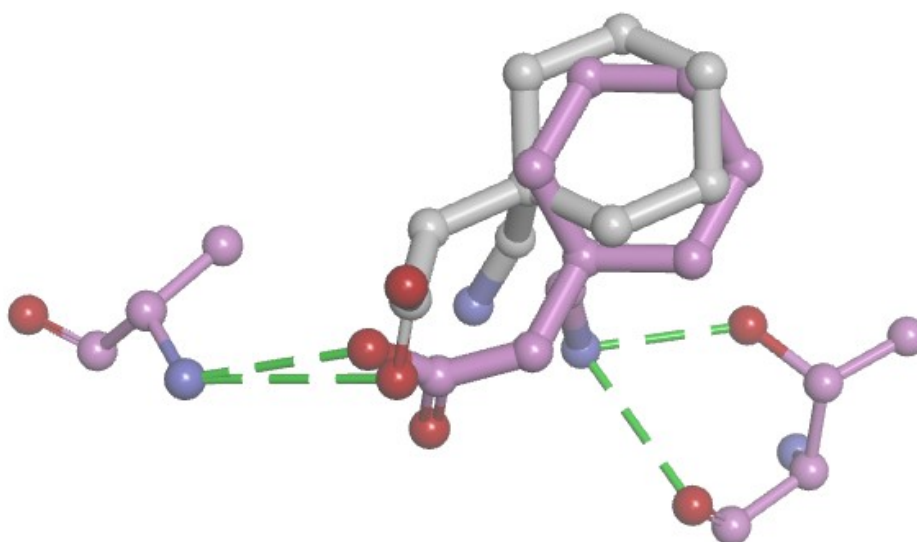

| mode | affinity<br>(kcal/mol) | dist from best mode<br>rmsd l.b. | rmsd u.b. |
|------|------------------------|----------------------------------|-----------|
| 1    | -5.5                   | 0.000                            | 0.000     |
| 2    | -5.2                   | 2.142                            | 3.012     |
| 3    | -5.0                   | 11.938                           | 13.072    |
| 4    | -4.9                   | 1.961                            | 2.784     |
| 5    | -4.9                   | 2.377                            | 3.152     |
| 6    | -4.8                   | 11.793                           | 12.482    |
| 7    | -4.8                   | 1.952                            | 2.452     |
| 8    | -4.7                   | 2.794                            | 3.591     |
| 9    | -4.7                   | 8.714                            | 10.064    |

Writing output ... done.

**Figure S2:** Superimposition of co-crystallized gabapentin (purple) and redocked gabapentin (white) for validation of docking protocol.

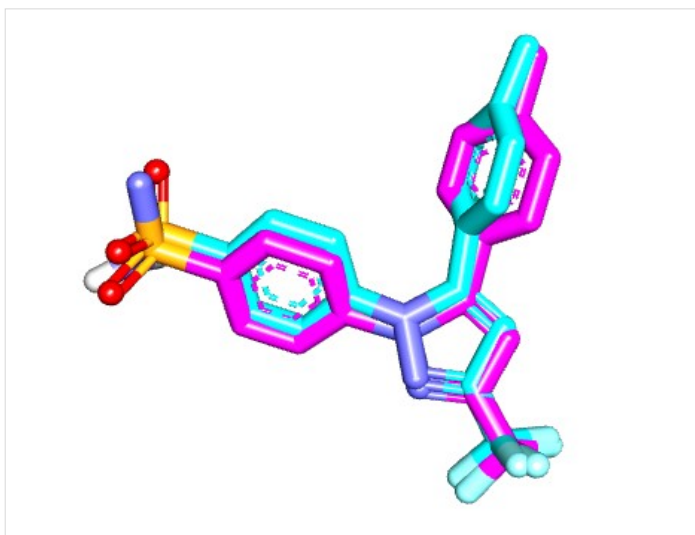

| mode | affinity<br>(kcal/mol) | dist from best mode |           |
|------|------------------------|---------------------|-----------|
|      |                        | rmsd l.b.           | rmsd u.b. |
| 1    | -11.0                  | 0.000               | 0.000     |
| 2    | -8.8                   | 4.943               | 6.434     |
| 3    | -8.5                   | 3.875               | 5.950     |
| 4    | -8.2                   | 4.874               | 7.274     |

Writing output ... done.

**Figure S3:** Superimposition of co-crystallized celecoxib **B** (purple) and redocked celecoxib (Cyan) for validation of docking protocol.

# *Experimental procedures and instruments*

## 1 Material and methods

### 1.1 Bioinformatics study

#### 1.1.1 Identification of related targets for anti-inflammatory, anti-epilepsy and Prediction of compound targets

Targets associated with anti-inflammatory and anti-epilepsy were retrieved from GeneCards platform (<https://www.genecards.org/>) and DisGeNET (<https://disgenet.com/>). Then, these collected targets were merged, and duplicates were removed. In parallel, the predicted molecular targets of the active compounds **5d**, **5e**, **5f**, **7b**, **10d**, **10e**, and compound **13d**, were obtained using Swiss target prediction (STP) (<http://www.swisstargetprediction.ch/>). specifying Homo sapiens as the target species. The intersection of anti-inflammatory and anti-epilepsy - related targets and compound-associated targets was determined and visualized using VENNY 2.1.0 (<https://bioinfogp.cnb.csic.es/tools/venny/>).

#### 1.1.2 Gene ontology (GO) functional annotation and Kyoto Encyclopedia of Genes and genomes (KEGG) pathway analysis

ShinyGO (<http://bioinformatics.sdstate.edu/go/>) is a web-based tool designed for the analysis of gene expression data, focusing on GO terms, pathway analysis, and protein–protein interaction networks. GO enrichment analysis primarily focuses on the biological processes while, KEGG enrichment analysis is aimed at identifying the biological pathways and functions associated with those targets. It enables researchers to explore BP associated with gene lists, offering valuable insights into disease mechanisms and potential therapeutic targets.

### 1.2 Experimental animals

Experiments were performed on adult male Sprague-Dawley rats (weighing ~130–150 g) and male Swiss albino mice (weighing ~23–30 g). The rats were used for anti-inflammatory and analgesic assays, while the mice were used for the seizure models and subsequent toxicity assessments. All animals were housed under standard laboratory conditions (22 ± 2 °C, 50-60% relative humidity, 12 h light/dark cycle) with free access to standard chow and water. Animals were acclimatized for at least one week prior to experimentation to minimize stress. All procedures were conducted in accordance with the NIH Guide for the Care and Use of Laboratory Animals and were approved by the Faculty Pharmacy Research Ethics Committee.

### 1.3 Carrageenan-induced paw edema (anti-inflammatory assay)

Acute anti-inflammatory activity was evaluated using the carrageenan-induced hind paw edema model. Sprague-Dawley rats were randomly divided into eleven groups (n = 6 per group): a normal control group (vehicle only, no carrageenan), a negative control group (carrageenan with vehicle pretreatment), two reference drug groups (indomethacin and celecoxib), and one group for each of the seven test compounds (**5d**, **5e**, **5f**, **7b**, **10d**, **10e**, **13b**). Test compounds and reference drugs were prepared as suspensions in 0.5% carboxymethylcellulose (CMC) and administered orally (p.o.) at a dose of 20 mg/kg. One hour after treatment, inflammation was induced in all groups except the normal control by a subplantar injection of 0.1 mL  $\lambda$ -carrageenan (1% w/v in sterile saline) into the right hind paw. The normal control group received an equal volume of saline in the paw instead. Paw thickness (swelling) was measured for each rat using a digital Vernier caliper at baseline (immediately before carrageenan injection) and then at hourly intervals for 5 hours post-injection. The degree of edema at each time point was calculated as the change in paw thickness ( $\Delta$  thickness = thickness at time t minus baseline thickness). From these data, the percentage inhibition of edema in each treated group relative to the carrageenan control was determined using the formula: Inhibition (%) =  $[(\Delta \text{ paw thickness of carrageenan control} - \Delta \text{ paw thickness of treated}) / \Delta \text{ paw thickness of carrageenan control}] \times 100$ . At the end of the 5 h observation period, the rats were humanely euthanized with an overdose of pentobarbital (100 mg/kg i.p.) followed by cervical dislocation. Both hind paws were then excised at the ankle joint and weighed. The edema was additionally quantified as the percentage increase in paw weight of the inflamed (right) paw compared to the non-inflamed (left) paw, calculated as: paw weight increase (%) =  $[(\text{right paw weight} - \text{left paw weight}) / \text{left paw weight}] \times 100$ .

### 1.4 PTZ-induced seizure model (anticonvulsant screening)

The anticonvulsant activity of the test compounds was first screened in the acute pentylenetetrazol (PTZ)-induced seizure model. Male Swiss albino mice were randomly divided into nine groups (10 mice per group) for this experiment: (1) Vehicle control + PTZ, mice pretreated with vehicle (0.5% CMC p.o.) and then challenged with PTZ; (2) Valproate + PTZ, positive control group in which mice received the reference antiepileptic drug sodium valproate (300 mg/kg p.o.) 30 min before PTZ; (3-9) Test compound + PTZ, groups pretreated with compounds **5d**, **5e**, **5f**, **7b**, **10d**, **10e**, or **13b** (each at 20 mg/kg p.o., 30 min before PTZ). The PTZ convulsive challenge was

administered to all groups as a single intraperitoneal injection of 85 mg/kg PTZ (in 0.9% saline) (Du et al., 2025). Immediately after PTZ injection, mice were placed individually into observation chambers and monitored for seizure activity by an observer blinded to the treatments. Seizure manifestations were identified as per standard criteria (forelimb clonus and/or loss of righting reflex indicating a generalized tonic-clonic seizure). Each mouse was observed for at least 30 minutes post-PTZ, or until a generalized seizure followed by recovery or death had occurred. The occurrence of tonic-clonic seizures was recorded. The primary outcome measure for anticonvulsant efficacy was the protection rate, defined as the percentage of mice in each group that did not develop generalized seizures during the observation period and relative efficacy compared with the valproate-treated group. Additionally, mortality was recorded for 24 hours after PTZ injection as a secondary outcome.

### **1.5 Pilocarpine-induced seizure model (status epilepticus)**

Compounds were further evaluated in the pilocarpine-induced seizure model. For this assay, male mice were assigned to the following groups (n = 10 per group): Normal control (vehicle only, no pilocarpine), Pilocarpine control (vehicle pretreatment, then pilocarpine), Valproate + pilocarpine (300 mg/kg valproate p.o.), and Test compound + pilocarpine groups for each compound (20 mg/kg p.o.). All mice received an intraperitoneal injection of scopolamine butylbromide (1 mg/kg, i.p.) 20 min prior to pilocarpine, to minimize peripheral cholinergic symptoms (salivation, convulsions in peripheral muscles) without affecting central seizure activity. Pilocarpine was then administered at 300 mg/kg i.p. to induce seizures. This dose is known to provoke an episode of status epilepticus (SE) in untreated mice, characterized by continuous or recurrent seizures lasting for hours. Behavioral seizure activity was monitored for 120 minutes after pilocarpine injection in each animal. Seizure severity was scored according to Racine's scale (stage 0 = no response; 1 = facial automatisms and drooling; 2 = head nodding; 3 = forelimb clonus; 4 = rearing with clonus; 5 = generalized tonic-clonic seizures with loss of posture) at 30 min intervals. The latency to seizure onset was defined as the time from pilocarpine injection to the first occurrence of a stage 3 seizure (onset of forelimb clonus). The number of animals that survived 24 hours after pilocarpine was recorded for each group. For humane reasons, any mouse still in status epilepticus at 2 h was given diazepam to halt seizures and counted as a survivor if it lived 24 h, though its seizure severity was maximal.

## 1.6 Assessment of inflammatory mediators in carrageenan-induced paw edema

Following the completion of the anti-inflammatory assay, only the most promising candidate, compound **7b**, was advanced for biomarker evaluation. Compound **7b** was selected based on its superior inhibition of paw edema and favorable profile in preliminary assays. To explore its mechanistic effects on key inflammatory pathways, paw exudates were collected from carrageenan-injected rats treated with **7b**, along with normal control, carrageenan control and reference drugs groups. Immediately after sacrifice, paw tissues from the site of injection were excised and paw exudate were analyzed for inflammatory markers. The expression levels of cyclooxygenase-2 (COX-2), tumor necrosis factor- $\alpha$  (TNF- $\alpha$ ), and prostaglandin E<sub>2</sub> (PGE<sub>2</sub>) were quantified using ELISA kits specific for each marker: COX-2 (MyBioSource, USA), TNF- $\alpha$  (Cloud-Clone Corp., USA), and PGE<sub>2</sub> (MyBioSource, USA). All assays were conducted in accordance with manufacturers' instructions. Protein content was determined using the biuret protein assay using bovine serum albumin as standard, and results were normalized to the protein concentration in each sample.

## 1.7 Hot plate test (analgesic assay)

To verify potential central analgesic effects, compound **7b** was evaluated in the hot plate latency test, as it had demonstrated the most robust anti-inflammatory profile in the carrageenan assay. Male Sprague-Dawley rats were divided into four groups (n = 6 per group): vehicle control, indomethacin, celecoxib, and **7b**. All treatments were administered orally at 20 mg/kg suspended in 0.5% CMC. Analgesic response was assessed at 30, 60, 90, and 120 minutes post-administration using a heated plate maintained at 50  $\pm$  0.5 °C. Animals were confined on the plate with a transparent acrylic cylinder, and the response latency (time to hind paw lick or jump) was recorded. A cut-off time of 30 seconds was enforced to exclude tissue injury. All measurements were conducted by blinded observers to minimize bias.

## 1.8 In vitro cyclooxygenase (COX-1/COX-2) inhibition assay:

The *in vitro* enzyme assays were performed at Biochemistry Department, Cairo General Hospital, Egypt. Cayman® colorimetric COX (ovine) inhibitor screening assay kit (Item No. 560131 – Michigan, USA) was used for monitoring the activity of COX-1 and COX-2 enzymes in presence of all newly compounds. Generally, this kit is dependent on the reductive reaction of COX. A specific antibody binds to PGH<sub>2</sub> produced by COX and further quantified by ELISA

technique as previously reported. After that, the selectivity index (SI) was calculated as the following equation:

$$\text{Selectivity index (SI)} = \frac{IC_{50} \text{ of COX - 1}}{IC_{50} \text{ of COX - 2}}$$

### 1.9 In vitro lipoxygenase (5-LOX) inhibition assay:

According to Cayman® (Michigan, USA) guidelines, 5-LOX inhibitor screening assay kit (Item No. 760700) was employed for detection the activity of 5-LOX against quercetin (QRC) in presence of all newly compounds.

### 1.10 Biomarker analysis in the hippocampus

To investigate neurochemical and inflammatory changes underlying seizure protection, brain tissue was collected from mice in the pilocarpine experiments for biochemical analyses. In particular, for the most effective compound (7b), as well as for comparison groups (untreated normal mice, pilocarpine-alone controls, and valproic acid treated group), hippocampal tissues were isolated at the end of the 24 h observation period. Mice were deeply anesthetized and decapitated; the brains were rapidly removed and the hippocampi dissected on ice. The tissue samples were frozen at -80 °C until assay. Hippocampal samples were homogenized in ice-cold phosphate-buffered saline (10% w/v homogenate), and the homogenates were centrifuged at  $12,000 \times g$  for 15 min at 4 °C. The supernatants were collected for ELISA quantification of glutamate and inflammatory markers. Specifically, glutamate was (as an index of excitatory neurotransmitter release), TNF- $\alpha$  and IL-6 (pro-inflammatory cytokines), and the glial activation markers GFAP (astrocytic marker) and Iba-1 (microglial marker) in the hippocampal supernatants. Commercial ELISA kits were used for each analyte: glutamate (kit from MyBioSource, USA), TNF- $\alpha$  (Cusabio, USA), IL-6 (R&D Systems, USA), GFAP (MyBioSource, USA), and Iba-1 (MyBioSource, USA), according to the manufacturers' instructions. All measurements were normalized to the total protein content of the sample (pg or ng per mg of protein). Total protein was determined by the biuret protein assay using bovine serum albumin as standard.

### 1.11 Toxicological evaluation

A preliminary safety assessment of compound 7b was performed by examining vital organ function indicators. A separate cohort of Swiss albino mice was used for this purpose. Mice were

divided into two groups (n = 6 per group): a vehicle control group and a high-dose **7b** group. The treated group received a single oral dose of 7b at 100 mg/kg p.o. (suspended in 0.5% CMC), which is five times the dose used in efficacy tests, to challenge the safety margin. Control mice received an equivalent volume of vehicle. After dosing, all animals were closely observed for 48 hours for any signs of acute toxicity or distress. Observational parameters included general behavior, locomotor activity, posture and gait, grooming and fur appearance, food and water intake, and the occurrence of any neurological symptoms (tremors, convulsions, lethargy) or mortality. At the end of the 48-h observation period, mice were anesthetized and blood samples were collected via retro-orbital sinus puncture. Blood was allowed to clot and then centrifuged at 3000 rpm for 10 min to obtain serum. Biochemical markers of organ function were measured in serum using standard diagnostic kits according to the manufacturers' protocols. Hepatic function was evaluated by assaying serum alanine aminotransferase (ALT) and aspartate aminotransferase (AST) activities using kits from Spectrum Diagnostics (Cairo, Egypt). Renal function was assessed by measuring blood urea nitrogen (BUN) and creatinine levels using kits from Spectrum Diagnostics. Cardiac injury markers were also examined: creatine kinase-MB (CK-MB) activity was measured as an indicator of myocardial enzyme release, and troponin T levels were determined by ELISA kits from LSBio (Cat# LS-F5746) and MyBioSource (Cat# MBS730382), respectively. These parameters (liver enzymes, renal indices, cardiac markers) were chosen to detect any subclinical organ toxicity from compound 7b. All measurements were compared to the vehicle control values to identify significant deviations.

### **1.12 Statistical analysis**

Data were expressed as mean  $\pm$  standard deviation (SD) for each experimental group. Statistical analysis was performed using GraphPad Prism software (v9.5.1, Demo). For paw edema, seizure severity, and analgesic activity, a two-way analysis of variance (ANOVA) was used, followed by Tukey's multiple-comparison post hoc test at each time point. Single-time-point comparisons were done using one-way ANOVA, followed by Tukey's post hoc test for pairwise group comparisons. Comparisons related to the toxicological evaluation were carried out using the unpaired Student's t-test. A P value  $< 0.05$  was considered statistically significant for all analyses.

### **1.13 *In-silico* ADME study**

The physicochemical descriptors, along with the predicted pharmacokinetic and drug-likeness profiles of the synthesized compounds, were assessed using the SwissADME and ProTox 3.0 web servers. In the early stages of drug development, it is imperative to evaluate these properties, as they play a critical role in determining the success of a candidate compound. Beyond potency, the absorption, distribution, metabolism, excretion, and toxicity (ADMET) characteristics, as well as overall drug-likeness, are essential considerations in optimizing lead compounds for further development. These parameters help predict the compound's behavior in biological systems, thereby facilitating the selection of candidates with favorable pharmacological profiles, in addition the target prediction survey was conducted with SwissTargetPrediction

### **1.14 Molecular Docking Studies**

Molecular docking was employed to investigate the interactions between the synthesized ligands and the target protein, in comparison with a standard drug. Docking simulations were performed using the crystal structure of reduced human cytosolic branched-chain aminotransferase (VGSCs; PDB ID: 2COJ), obtained from the RCSB Protein Data Bank (<https://www.rcsb.org/>) in PDB format. Molecular docking was carried out using AutoDock 4.2 software. The resulting protein–ligand interaction complexes were visualized, and 2D interaction diagrams were generated using BIOVIA Discovery Studio Visualizer to analyze binding modes and key interacting residues
